# Supplementary material
Source: publisher site journal article supplement (https://www.dovepress.com/article/336784)
Supplement: Supplementary file 1 [file get_supplementary_file.php]

**Supplementary material**

**Supplementary Table 1: Critical appraisal of the included cross-sectional studies using the Joanna Briggs Institute critical appraisal tools for study designs**

|  | Cross-sectional study | Aspinall et al. 2015.21 | Bell et al., 2016.25 | Colon-Emeric et al., 2017.22 | Nyborg et al., 2017.29 |
| --- | --- | --- | --- | --- | --- |
| 1 | Were the inclusion criteria clearly defined? | Y | Y | Y | Y |
| 2 | Were the study subjects and setting described in detail? | Y | Y | Y | Y |
| 3 | Was the exposure measured in a valid and reliable way? | U | Y | Y | Y |
| 4 | Were objective, standard criteria used to measure the condition? | Y | Y | Y | Y |
| 5 | Were confounding factors identified? | N | Y | N | Y |
| 6 | Were strategies to deal with confounding factors stated? | Y | Y | N | Y |
| 7 | Were the outcomes measured in a valid and reliable way? | Y | Y | Y | Y |
| 8 | Were appropriate statistical analyses used? | Y | Y | Y | Y |

Key: Y= Yes; N=No; U=Unclear; NA=Not applicable

**Supplementary Table 2: Critical appraisal of the included prospective studies using the Joanna Briggs Institute critical appraisal tools for study designs**

|  | Prospective studies | Datta et al., 2018.6 | Hartog et al., 2015.27 | Hartog et al., 2017.26 |
| --- | --- | --- | --- | --- |
| 1 | Were the two groups similar and recruited from the same population? | Y | Y | Y |
| 2 | Were the exposures measured similarly to assign people to both exposed and unexposed groups? | Y | Y | Y |
| 3 | Was the exposure measured in a valid and reliable manner? | Y | Y | Y |
| 4 | Were confounding factors identified? | U | Y | U |
| 5 | Were strategies to deal with confounding factors stated? | U | Y | U |
| 6 | Were the groups/participants free of the outcome at the start of the study (or at the moment of exposure)? | Y | Y | Y |
| 7 | Were the outcomes measured in a valid and reliable way? | Y | Y | Y |
| 8 | Was the follow-up time reported and sufficient for outcomes to occur? | Y | Y | Y |
| 9 | Was follow-up complete, and if not, were the reasons for loss to follow-up described and explored? | Y | Y | Y |
| 10 | Were strategies used to address incomplete follow-up? | U | Y | Y |
| 11 | Were appropriate statistical analyses used? | Y | Y | Y |

Key: Y= Yes; N=No; U=Unclear; NA=Not applicable**Supplementary Table 3: Critical appraisal of the included case-control studies using the Joanna Briggs Institute critical appraisal tools for study designs**

|  | Case-control studies | Aspinall et al., 2019.20 | Cox et al., 2016.23 |
| --- | --- | --- | --- |
| 1 | Were the groups comparable other than the presence of disease in cases or the absence of disease in controls? | Y | Y |
| 2 | Were cases and controls matched appropriately? | Y | Y |
| 3 | Were the same criteria used for identification of cases and controls? | Y | Y |
| 4 | Was exposure measured in a standard, valid and reliable way? | Y | Y |
| 5 | Was exposure measured in the same way for cases and controls? | Y | Y |
| 6 | Were confounding factors identified? | U | Y |
| 7 | Were strategies to deal with confounding factors stated? | Y | Y |
| 8 | Were outcomes assessed in a standard, valid and reliable way for cases and controls? | Y | Y |
| 9 | Was the exposure period of interest long enough to be meaningful? | Y | Y |
| 10 | Was appropriate statistical analysis used? | Y | Y |

Key: Y= Yes; N=No; U=Unclear; NA=Not applicable

**Supplementary Table 4: Critical appraisal of the included cohort studies using the Joanna Briggs Institute critical appraisal tools for study designs**

|  | Cohort studies | Bronskill et al., 2018.28 | Hall et al., 2015.24 |
| --- | --- | --- | --- |
| 1 | Were the two groups similar and recruited from the same population? | Y | Y |
| 2 | Were the exposures measured similarly to assign people to both exposed and unexposed groups? | Y | Y |
| 3 | Was the exposure measured in a valid and reliable way? | Y | Y |
| 4 | Were confounding factors identified? | Y | Y |
| 5 | Were strategies to deal with confounding factors stated? | Y | Y |
| 6 | Were the groups/participants free of the outcome at the start of the study (or at the moment of exposure)? | Y | Y |
| 7 | Were the outcomes measured in a valid and reliable way? | Y | Y |
| 8 | Was the follow up time reported and sufficient to be long enough for outcomes to occur? | Y | Y |
| 9 | Was follow up complete, and if not, were the reasons to loss to follow up described and explored? | Y | Y |
| 10 | Were strategies to address incomplete follow up utilized? | NA | U |
| 11 | Was appropriate statistical analysis used? | Y | Y |

Key: Y= Yes; N=No; U=Unclear; NA=Not applicable
